# Supplementary material
Source: PubMed Central journal article supplement (PMC7301849)
Supplement: AEM.00322-20-s0001.pdf [file AEM.00322-20-s0001.pdf]

**Table S1** Lists of keystone species in co-occurrence network.

| OTU ID              | Betweenness centrality | Degree | Modularity classes | Category | Taxonomy                                                                                        |
|---------------------|------------------------|--------|--------------------|----------|-------------------------------------------------------------------------------------------------|
| EU132794.1.1350     | 4824.77                | 80     | I                  | Other    | p_Actinobacteria;c_Acidimicrobiia;o_Acidimicrobiales;f_uncultured                               |
| New.ReferenceOTU48  | 4108.08                | 80     | I                  | Abundant | p_Gemmatimonadetes;c_S0134 terrestrial group                                                    |
| KR779675.1.1326     | 4887.82                | 79     | II                 | Other    | p_Chloroflexi;c_KD4-96;o_Ambiguous_taxa;f_Ambiguous_taxa;g_Ambiguous_taxa                       |
| AB696516.1.1486     | 4548.11                | 76     | I                  | Other    | p_Gemmatimonadetes;c_BD2-11terrestrialgroup;o_uncultured;f_uncultured;g_uncultured;             |
| JN417572.1.1515     | 4203.73                | 74     | I                  | Abundant | p_Bacteroidetes;c_Cytophagia;o_Cytophagales;f_Cytophagaceae;g_uncultured                        |
| EF020094.1.1342     | 3089.75                | 74     | I                  | Other    | p_Chloroflexi;c_Anaerolineae;o_Anaerolineales;f_Anaerolineaceae;g_uncultured                    |
| HG970666.1.1395     | 4311.19                | 72     | I                  | Other    | p_Bacteroidetes;c_Sphingobacteriia;o_Sphingobacteriales;f_Chitinophagaceae;g_Flavisolibacter    |
| HF548406.1.1395     | 3719.40                | 71     | I                  | Other    | p_Proteobacteria;c_Alphaproteobacteria;o_Sphingomonadales;f_Sphingomonadaceae;g_Sphingomonas    |
| New.ReferenceOTU947 | 3373.32                | 71     | I                  | Other    | p_Proteobacteria;c_Deltaproteobacteria;o_Myxococcales;f_Sandaracinaceae;g_uncultured            |
| New.ReferenceOTU546 | 2976.71                | 71     | I                  | Other    | p_Proteobacteria;c_Alphaproteobacteria;o_Rhizobiales;f_KF-JG30-B3;g_uncultured                  |
| FJ479428.1.1498     | 1251.44                | 71     | I                  | Other    | p_Proteobacteria;c_Betaproteobacteria;o_Nitrosomonadales;f_Nitrosomonadaceae;g_uncultured       |
| JN869200.1.1518     | 4492.45                | 70     | I                  | Other    | p_Acidobacteria;c_Blastocatellia;o_Blastocatellales;f_Blastocatellaceae(Subgroup4);g_uncultured |
| HQ119409.1.1418     | 4017.12                | 70     | I                  | Other    | p_Proteobacteria;c_Deltaproteobacteria;o_Myxococcales;f_Haliangiaceae;g_Haliangium              |
| KM108700.1.1482     | 3529.48                | 70     | I                  | Other    | p_Bacteroidetes;c_Cytophagia;o_Cytophagales;f_Cytophagaceae;g_uncultured                        |
| HQ697772.1.1470     | 2037.38                | 70     | I                  | Other    | p_Chloroflexi;c_Anaerolineae;o_Anaerolineales;f_Anaerolineaceae;g_uncultured                    |
| AY921851.1.1351     | 1972.26                | 70     | I                  | Other    | p_Chloroflexi;c_Anaerolineae;o_Anaerolineales;f_Anaerolineaceae;g_Anaerolinea                   |
| HM339535.1.1306     | 1518.54                | 70     | I                  | Other    | p_Proteobacteria;c_Alphaproteobacteria;o_Sphingomonadales;f_Sphingomonadaceae;g_Sphingomonas    |

Nodes with high degree (> 70) and low betweenness centrality values (< 5000) are recognized as keystone species in co-occurrence network.

**Table S2** Distance-based multivariate linear model of bacterial community variability against the physico-chemical properties of the sediment samples after 999 permutations. Marginal tests: each variable was analyzed individually (ignoring other variables); Sequential tests: forward selection of variables, the percentage of variation explained by each variable added to the model was conditional on the variables already in the model.

Abundant subcommunity:

| Marginal tests  |          |                 |                             |
|-----------------|----------|-----------------|-----------------------------|
| Variable        | Pseudo-F | <i>P</i> -value | Percent variation explained |
| AK              | 34.3361  | <b>0.001</b>    | 37.19                       |
| AP              | 28.1486  | <b>0.001</b>    | 32.67                       |
| Clay            | 41.3402  | <b>0.001</b>    | 41.61                       |
| EC              | 12.0215  | <b>0.001</b>    | 17.17                       |
| Fe <sub>d</sub> | 39.3916  | <b>0.001</b>    | 40.45                       |
| Ammonia         | 23.1766  | <b>0.001</b>    | 28.55                       |
| OC              | 25.6374  | <b>0.001</b>    | 30.65                       |
| pH              | 31.2531  | <b>0.001</b>    | 35.02                       |
| Sand            | 41.6672  | <b>0.001</b>    | 41.81                       |
| Silt            | 41.6577  | <b>0.001</b>    | 41.8                        |
| TN              | 18.545   | <b>0.001</b>    | 24.23                       |

  

| Sequential tests |          |                 |                             |                                |
|------------------|----------|-----------------|-----------------------------|--------------------------------|
| Variable         | Pseudo-F | <i>P</i> -value | Percent variation explained | Cumulative variation explained |
| Sand             | 41.6672  | <b>0.001</b>    | 41.81                       | 41.81                          |
| EC               | 27.027   | <b>0.001</b>    | 18.72                       | 60.52                          |
| OC               | 3.9346   | <b>0.001</b>    | 2.59                        | 63.12                          |
| AK               | 3.313    | <b>0.008</b>    | 2.10                        | 65.21                          |
| pH               | 2.7045   | <b>0.014</b>    | 1.66                        | 66.87                          |
| Ammonia          | 2.0143   | <b>0.041</b>    | 1.21                        | 68.08                          |
| Fe <sub>d</sub>  | 1.921    | 0.064           | 1.14                        | 69.22                          |
| TN               | 1.75     | 0.063           | 1.02                        | 70.24                          |
| AP               | 1.879    | 0.082           | 1.08                        | 71.32                          |
| Clay             | 1.3821   | 0.157           | 0.79                        | 72.11                          |
| Silt             | 0.7433   | 0.649           | 0.43                        | 72.53                          |

Data in bold are significantly correlated (*P*-value < 0.05).

Rare subcommunity:

| Marginal tests  |          |                 |                             |
|-----------------|----------|-----------------|-----------------------------|
| Variable        | Pseudo-F | <i>P</i> -value | Percent variation explained |
| AK              | 2.4516   | <b>0.001</b>    | 4.06                        |
| AP              | 2.7619   | <b>0.001</b>    | 4.55                        |
| Clay            | 2.9147   | <b>0.001</b>    | 4.78                        |
| EC              | 2.2821   | <b>0.001</b>    | 3.79                        |
| Fe <sub>d</sub> | 2.8845   | <b>0.001</b>    | 4.74                        |
| Ammonia         | 2.6272   | <b>0.001</b>    | 4.33                        |
| OC              | 2.6345   | <b>0.001</b>    | 4.34                        |
| pH              | 2.7658   | <b>0.001</b>    | 4.55                        |
| Sand            | 2.9196   | <b>0.001</b>    | 4.79                        |
| Silt            | 2.9186   | <b>0.001</b>    | 4.79                        |
| TN              | 2.5071   | <b>0.001</b>    | 4.14                        |

| Sequential tests |          |                 |                             |                                |
|------------------|----------|-----------------|-----------------------------|--------------------------------|
| Variable         | Pseudo-F | <i>P</i> -value | Percent variation explained | Cumulative variation explained |
| Sand             | 2.9196   | <b>0.001</b>    | 4.79                        | 4.79                           |
| EC               | 2.2897   | <b>0.001</b>    | 3.68                        | 8.47                           |
| pH               | 1.215    | <b>0.002</b>    | 1.94                        | 10.41                          |
| AK               | 1.1769   | <b>0.002</b>    | 1.88                        | 12.29                          |
| Ammonia          | 1.1223   | <b>0.014</b>    | 1.79                        | 14.08                          |
| OC               | 1.0968   | <b>0.044</b>    | 1.74                        | 15.82                          |
| Fe <sub>d</sub>  | 1.0663   | 0.153           | 1.69                        | 17.51                          |
| AP               | 1.0475   | 0.279           | 1.66                        | 19.17                          |
| TN               | 1.0713   | 0.186           | 1.70                        | 20.87                          |
| Clay             | 1.0147   | 0.48            | 1.61                        | 22.47                          |
| Silt             | 1.0001   | 0.545           | 1.58                        | 24.05                          |

Data in bold are significantly correlated ( $P$ -value < 0.05). AP, available phosphorus; AK, available potassium; TN, total nitrogen; OC, organic carbon; Fe<sub>d</sub>, free Fe<sub>2</sub>O<sub>3</sub>; EC, electrical conductivity.

**Table S3** The numbers of all, abundant and rare OTUs which was above and below the neutral model.

|          | Above | Neutral | Below |
|----------|-------|---------|-------|
| All      | 4996  | 40592   | 1092  |
| Abundant | 0     | 52      | 205   |
| Rare     | 577   | 25673   | 0     |

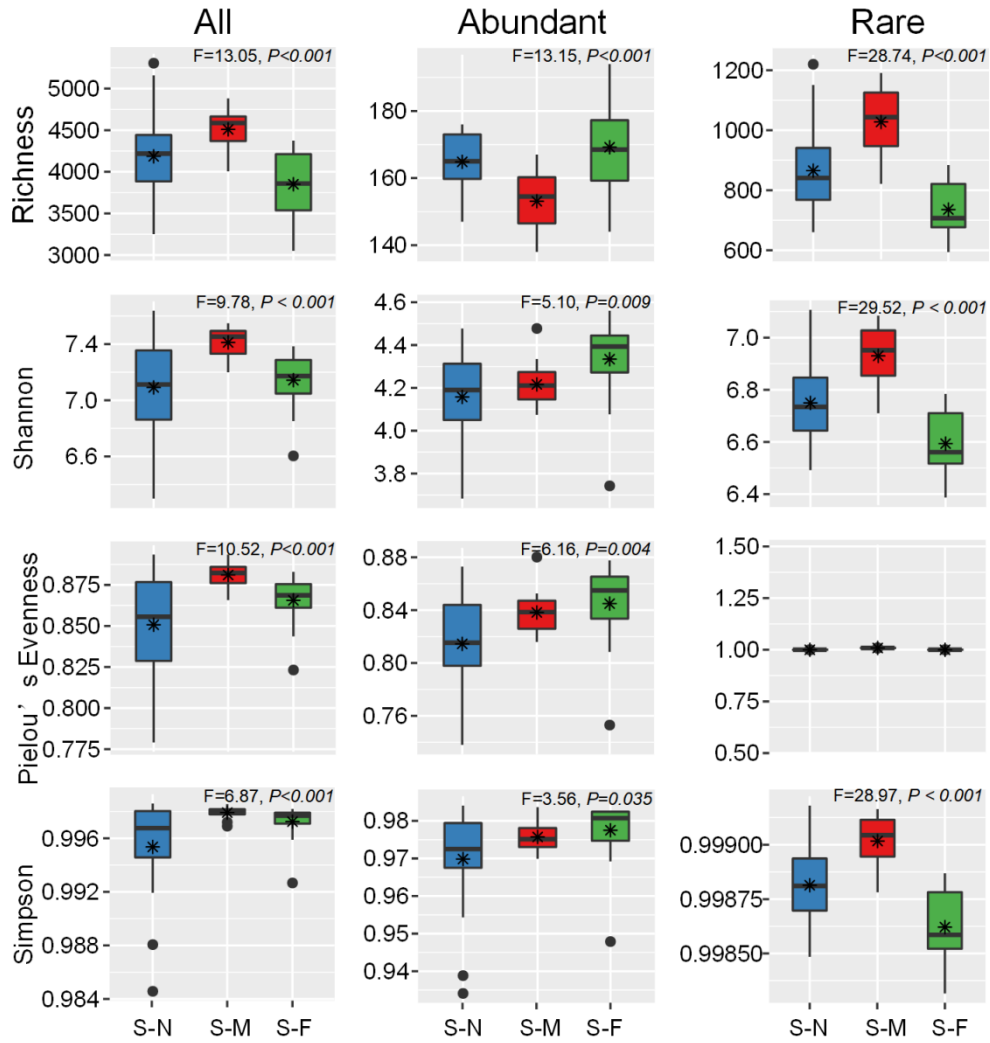

**Figure S1** Variation in alpha-diversity of all, abundant and rare bacterial community through sampling transects. One-way ANOVA was used to compare the differences among different transectss. See Table 1 for transect notation.

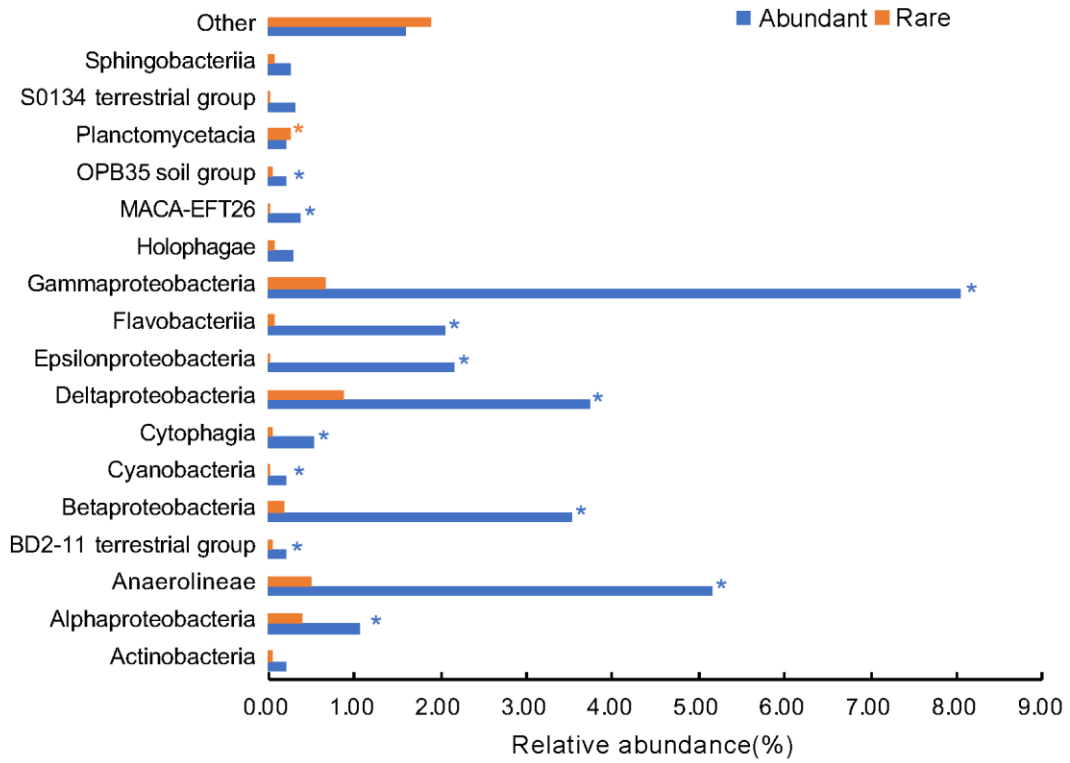

**Figure S2** Taxonomic distribution of the 10 most abundant classes (relative abundance) of the abundant and rare bacterial subcommunities in the sediments. \* indicates the significant level at  $P$ -value < 0.05 level determined by nonparametric Mann-Whitney U test. Abundant: abundant bacterial subcommunity. Rare: rare bacterial subcommunity.

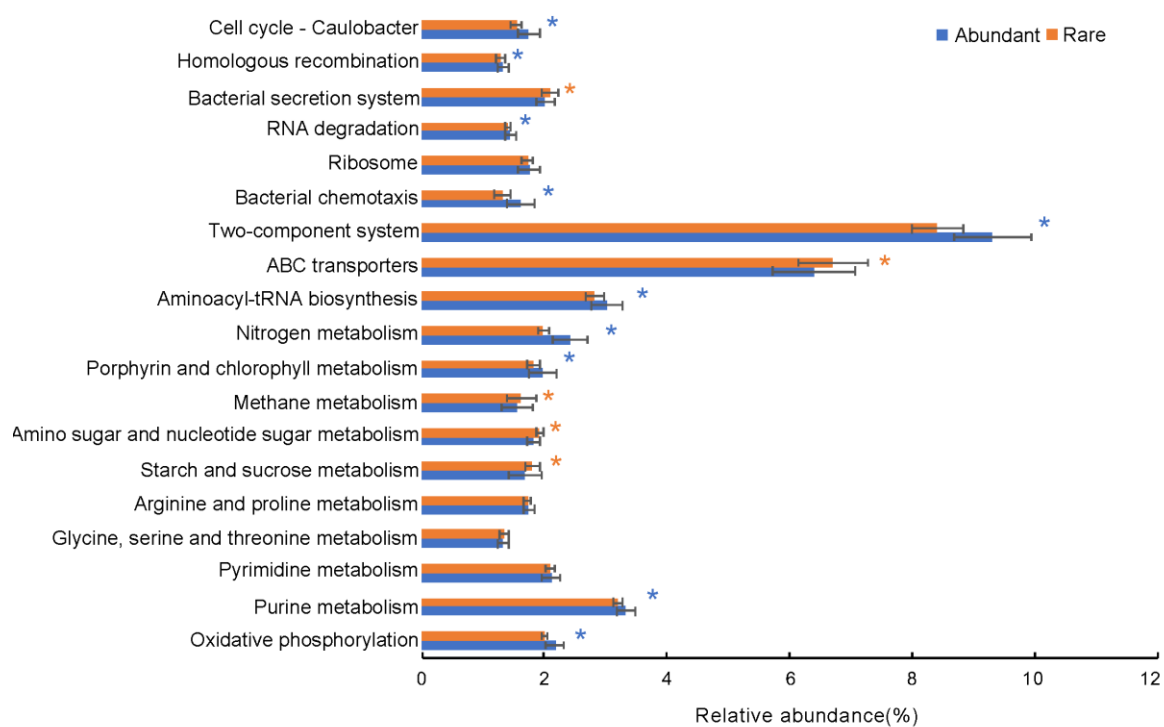

**Figure S3** Functional distribution of the 10 most abundant pathways in KEGG (relative abundance) of the abundant and rare bacterial subcommunities in the sediments. \* indicates the significant level at  $P$ -value < 0.05 level determined by nonparametric Mann-Whitney U test. Abundant: abundant bacterial subcommunity. Rare: rare bacterial subcommunity.

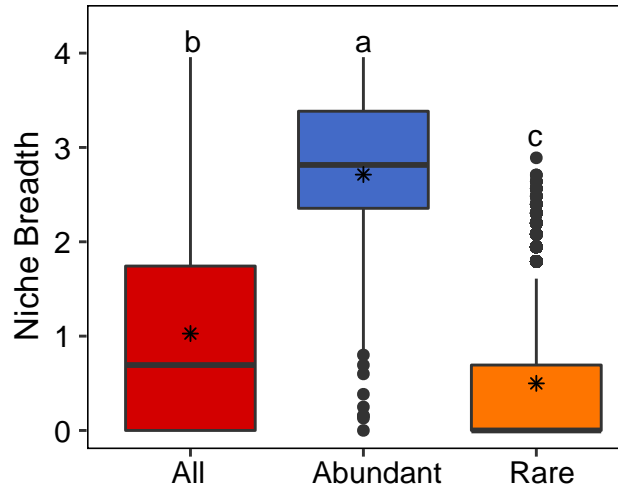

**Figure S4** Boxplots showing the mean niche breadth for the all, abundant and rare bacterial communities. The top and bottom boundaries of each box indicate the 75th and 25th quartile values, respectively, and lines and \* within each box represent the median values and mean values, respectively ( $n = 41,680$  for All,  $n = 258$  for Abundant, and  $n = 26,250$  for Rare). Different letters indicate the significant level at  $P$ -value  $< 0.05$  level. determined by nonparametric Mann-Whitney U test.



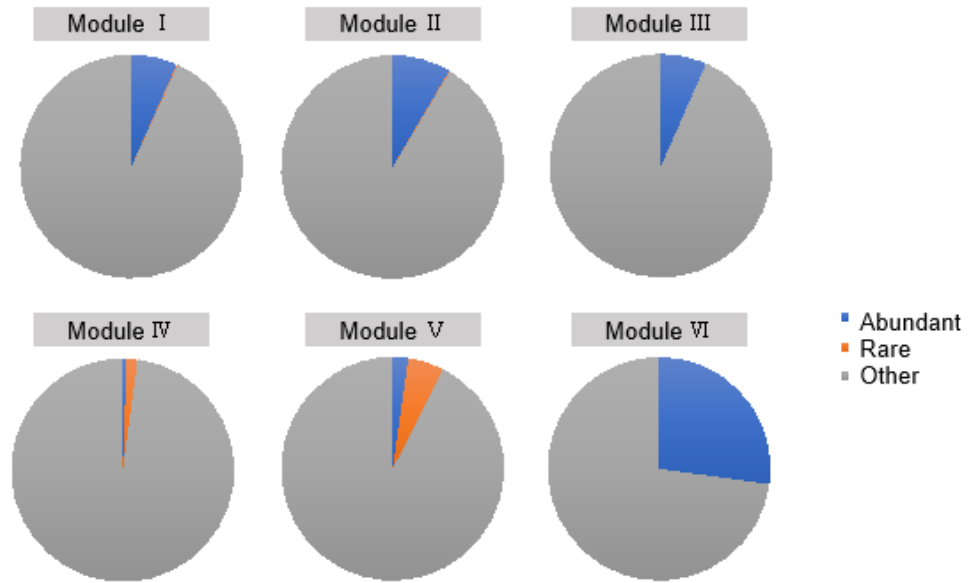

**Figure S5** Pie charts showing the richness proportion of different subcommunities in each major module of the co-occurrence network. Abundant: abundant bacterial subcommunity. Rare: rare bacterial subcommunity. Other, other bacterial subcommunity.

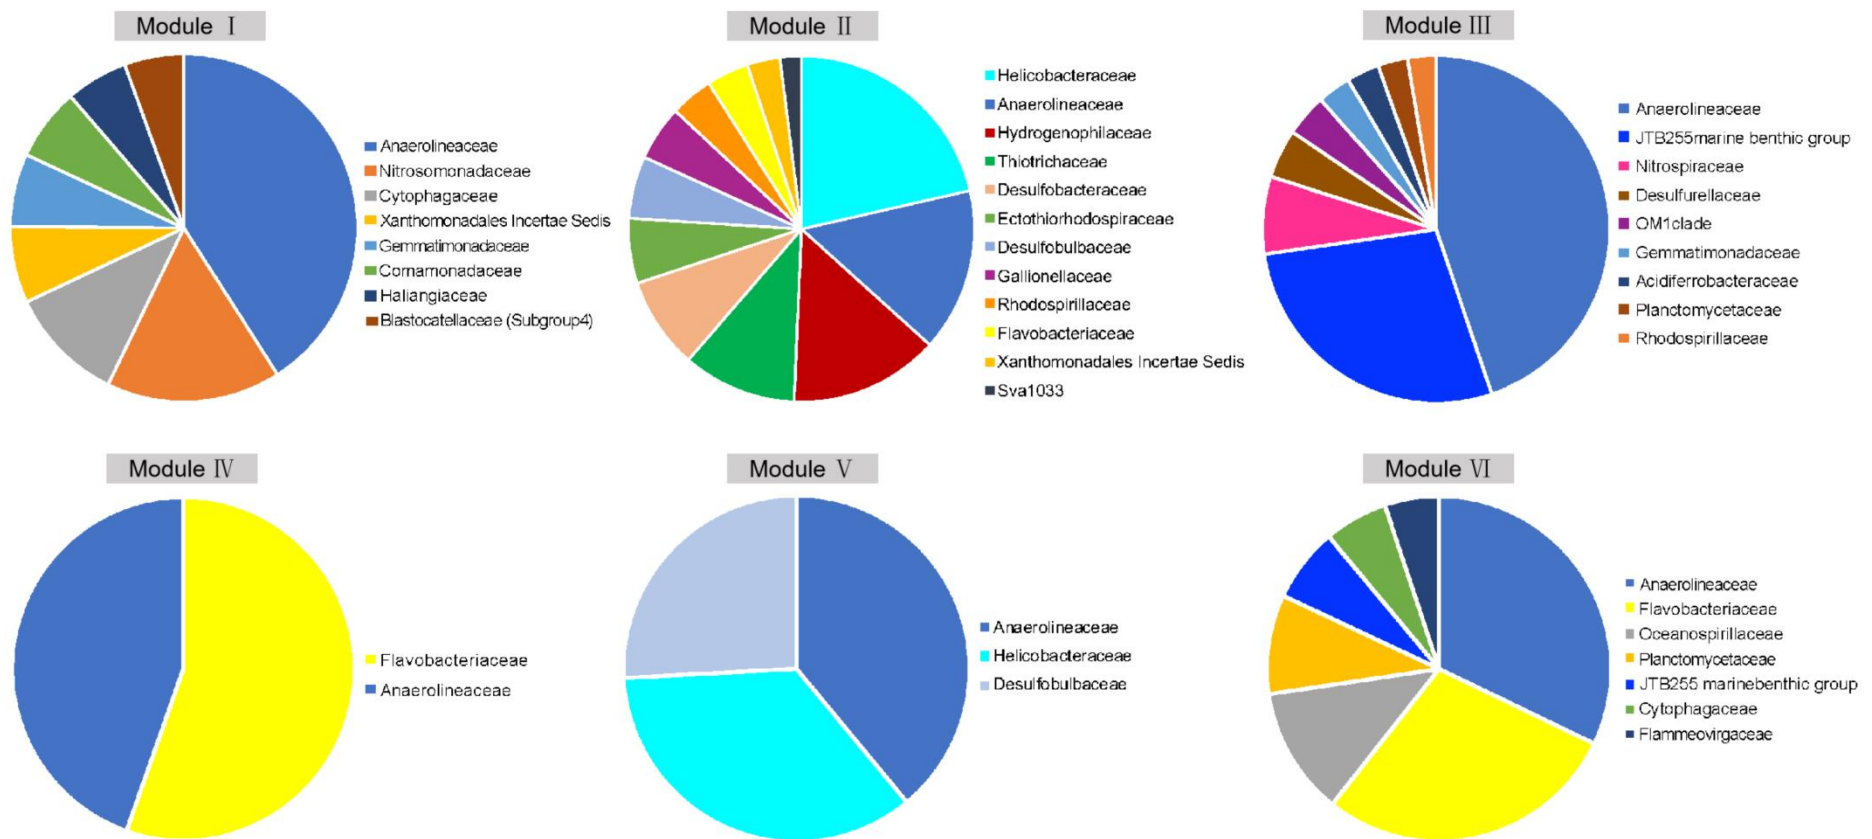

**Figure S6** The dominant (relative abundance > 0.5% at least in one sample in Module I, II, III; relative abundance > 0.1% at least in one sample in Module IV, V, VI) taxonomic distribution at family level in each module of the co-occurrence network.

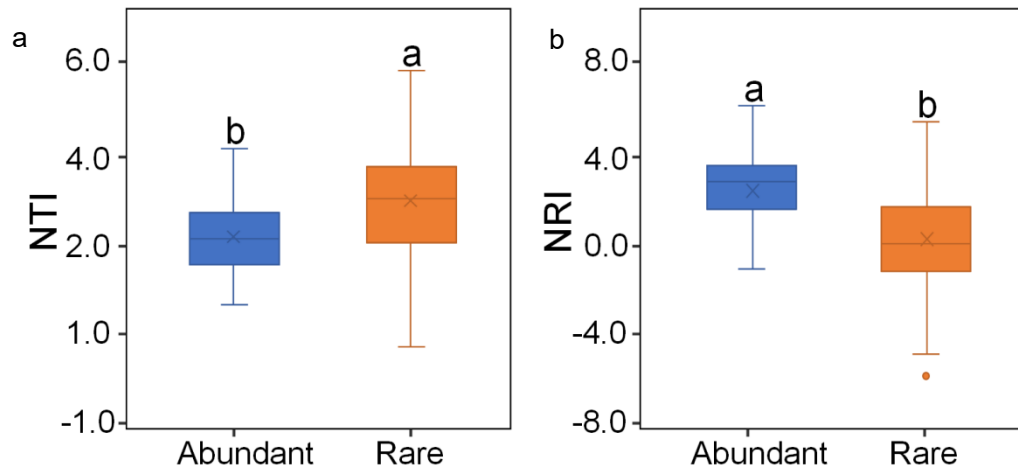

**Figure S7** The nearest taxon index (NTI) (a) and net relatedness index (NRI) (b) of abundant and rare bacterial subcommunity. Different letters above bars indicate a significant difference at the  $P$ -value  $< 0.05$  level according to nonparametric Mann-Whitney U test.
